# Supplementary material
Source: publisher figshare collection journal article supplement (https://sage.figshare.com/ndownloader/files/21001554)
Supplement: Supplementary file 1 [file 21001554]

**Table S5.** List of taxa recorded in the modern pollen rain and vegetation of Trilha da Mata Lake, Carajás North Ridge.

| Polle taxa | Pollen concentration | | Absolute frequency |
| --- | --- | --- | --- |
| *Aparisthmiun/Alchornea* | | 97.557 | 0.313 |
| *Miconia* undif. | | 59.675 | 0.063 |
| Poaceae undif. | | 48.268 | 1 |
| *Pleroma* | | 38.670 | 0.188 |
| *Mimosa actistispula* var. *ferrea* | | 21.713 | 0.313 |
| *Pseudopiptadenia suaveolens* | | 10.487 | 0.125 |
| *Mimosa* | | 6.587 | 0.313 |
| *Palicourea* | | 4.660 | 0.063 |
| *Tapirira guianensis* | | 3.903 | 0.063 |
| *Anthurium* *lindmanianum* | | 3.739 | 0.063 |
| *Perama carajasenses* | | 3.528 | 0.125 |
| *Inga* | | 2.571 | 0.188 |
| *Bellucia* *dichotoma* | | 2.259 | 0.063 |
| *Astronium* | | 1.968 | 0.063 |
| Fabaceae undif. | | 1.830 | 0.063 |
| *Erythroxylum nelson-rosae* | | 1.795 | 0.063 |
| *Machaerium* | | 1.374 | 0.125 |
| *Camptosema ellipticum* | | 1.102 | 0.063 |
| *Aniba* *guianensis* | | 1.077 | 0.063 |
| *Maprounea* | | 0.780 | 0.125 |
| *Cuphea* | | 0.630 | 0.125 |
| Bignoniaceae undif. | | 0.560 | 0.125 |
| *Inga edulis* | | 0.514 | 0.063 |
| *Myrcia* | | 0.365 | 0.125 |
| *Myrcia sylvatica* | | 0.347 | 0.25 |
| *Pouteria ramiflora* | | 0.334 | 0.063 |
| *Trichilia micrantha* | | 0.156 | 0.063 |
| *Diospyros vestita* | | 0.082 | 0.063 |
| *Matayba* | | 0.071 | 0.250 |
| *Abrus* *fruticulosus* | | 0.07 | 0.125 |
| *Bauhinia* type | | 0.048 | 0.063 |
